# Supplementary material for: HSP90 inhibition downregulates DNA replication and repair genes via E2F1 repression
Source: PubMed Central journal article supplement — J Biol Chem. 2021 Jul 21;297(2):100996. doi: 10.1016/j.jbc.2021.100996 (PMC8363837; doi:10.1016/j.jbc.2021.100996), 2021-07-21
Supplement: mmc1.pdf [file mmc1.pdf]

**Supplemental Table 1. IC<sub>50</sub> values of ganetespib on MCL cell lines JEKO-1, GRANTA-519, and MINO when treated either constantly for 72 h or transiently for 12h.**

| Cell lines | Ganetespib (IC <sub>50</sub> , nM) |                    |
|------------|------------------------------------|--------------------|
|            | Constantly (72 h)                  | Transiently (12 h) |
| JEKO-1     | 13.9 ± 3.1                         | 18.8 ± 2.9         |
| GRANTA-519 | 47.7 ± 9.3                         | 51.7 ± 7.1         |
| MINO       | 67.4 ± 10.1                        | 73.6 ± 11.0        |

**Table S2. Genes changed in the same direction in three MCL cell lines.**

| HSP-related | DNA Replication and Cell Cycle | B-Cell Marker | Unknown  |
|-------------|--------------------------------|---------------|----------|
| HSP90AA1    | MCM4                           | HLA-DQA1      | CHORDC1  |
| HSPA1B      | MCM7                           | HLA-DMB       | DEDD2    |
| BAG3        | MCM8                           |               | CASP1    |
| DNAJB1      | CDC6                           |               | DLEU2    |
| DNAJB4      | CDC45                          |               | ZNF367   |
|             | RMI2                           |               | NUDT6    |
|             | PRIM1                          |               | TMEM106C |
|             |                                |               | TCF19    |
|             |                                |               | ARL6IP6  |
|             |                                |               | DTL      |

Note: red means up-regulation, blue indicates down-regulation.

**Table S3. The transcription factor candidates.**

| <b>TF candidate</b> | <b>Number of articles related</b> | <b>Number of targeting gene (predicted)</b> |
|---------------------|-----------------------------------|---------------------------------------------|
| E2F1                | 39                                | 6                                           |
| p53                 | 70                                | 6                                           |
| AR                  | 10                                | 2                                           |
| c-Myc               | 32                                | 4                                           |

**Supplemental Table 4. IC<sub>50</sub> values of different cell lines with indicated treatment.**

| Cell lines        | Everolimus (IC <sub>50</sub> , nM) |                      |                 | Temsirolimus (IC <sub>50</sub> , nM) |                       |                 |
|-------------------|------------------------------------|----------------------|-----------------|--------------------------------------|-----------------------|-----------------|
|                   | Vehicle                            | Ganetespib (30 nM)   | <i>P</i> values | Vehicle                              | Ganetespib (45 nM)    | <i>P</i> values |
| <b>JEKO-1</b>     | <b>108.2 ± 33.75</b>               | <b>8.147 ± 4.461</b> | <b>0.042</b>    | <b>2.755 ± 0.5928</b>                | <b>1.286 ± 0.3135</b> | <b>0.094</b>    |
| <b>GRANTA-519</b> | <b>5026 ± 1172</b>                 | <b>243.0 ± 48.17</b> | <b>0.015</b>    | <b>2409 ± 430.6</b>                  | <b>374.4 ± 49.84</b>  | <b>0.009</b>    |

Note: the indicated cell lines were pre-treated with or without ganetespib for 12 hours, before they were treated with Everolimus or Temsirolimus. Data were presented as mean ± SD except for the increases of sensitivity.

**Supplementary Table 5. Antibodies used in this study.**

| Primary antibody              |             |        |                           |                                                     |                            |
|-------------------------------|-------------|--------|---------------------------|-----------------------------------------------------|----------------------------|
| Targeted protein              | Catalog No. | Source | Company                   | Application                                         | Note                       |
| Akt                           | #2920       | Mouse  | Cell Signaling Technology | Western blot, 1:1000<br>Immunohistochemistry, 1:100 |                            |
| STAT3                         | #9139       | Mouse  |                           |                                                     |                            |
| Cyclin D1                     | #2978       | Rabbit |                           |                                                     | Immunohistochemistry, 1:50 |
| NF-κB1                        | #3035       | Rabbit |                           |                                                     |                            |
| p-Erk1/2(Thr202/Tyr204)       | #9101       | Rabbit |                           |                                                     |                            |
| phospho-Histone H2A.X(Ser139) | #2577       | Rabbit |                           |                                                     |                            |
| Cdk1                          | ab126762    | Rabbit |                           |                                                     | Abcam                      |
| BTK                           | ab208937    | Rabbit |                           |                                                     |                            |
| c-Myc                         | ab32072     | Rabbit |                           |                                                     |                            |
| CDC6                          | ab109315    | Rabbit |                           |                                                     |                            |
| MCM4                          | ab124836    | Rabbit |                           |                                                     |                            |
| MCM7                          | ab52489     | Rabbit |                           |                                                     |                            |
| CDC45                         | ab126762    | Rabbit |                           |                                                     |                            |
| HSP90                         | UMA50002    | Mouse  | General Biosystems        |                                                     |                            |
| Ki67                          | sc-23900    | Mouse  | Santa cruz Biotechnology  |                                                     |                            |
| E2F1                          | sc-251      | Mouse  |                           |                                                     |                            |
| ALK                           | sc-398791   | Mouse  |                           |                                                     |                            |
| Bcl-6                         | sc-7388     | Mouse  |                           |                                                     |                            |

|                                  |             |        |                              |                               |        |
|----------------------------------|-------------|--------|------------------------------|-------------------------------|--------|
| JAK1                             | sc-1677     | Mouse  | Ruiying Biological           |                               |        |
| Cdk2                             | sc-6248     | Mouse  |                              |                               |        |
| Cdk4                             | sc-23896    | Mouse  |                              |                               |        |
| Cdk6                             | sc-7961     | Mouse  |                              |                               |        |
| PRIM1                            | sc-390265   | Mouse  |                              |                               |        |
| AR                               | sc-7305     | Mouse  |                              |                               |        |
| Bcl-2                            | RLM3041     | Mouse  |                              |                               |        |
| Survivin                         | RLM3419     | Mouse  |                              |                               |        |
| Cyclin B                         | RLT1169     | Rabbit |                              |                               |        |
| Erk1/2                           | RLT1625     | Rabbit |                              |                               |        |
| HSP90                            | RLM3480     | Mouse  |                              |                               |        |
| RMI2                             | PA5-59381   | Rabbit | Thermo Fisher Scientific     |                               |        |
| 53BP1                            | A300-272A   | Rabbit | BETHYL                       | Immunofluorescence,<br>1:1000 |        |
| $\beta$ -actin                   | A1978       | Mouse  | Cell Signaling<br>Technology |                               |        |
| <b>Secondary antibody</b>        |             |        |                              |                               |        |
| Goat anti-rabbit Alexa-fluor 488 | A11008      | Goat   | Life Technologies            | Immunofluorescence            | 1:1000 |
| Goat anti-Mouse<br>IgG(H+L)-HRP  | 115-035-003 | Goat   | Jackson<br>ImmunoResearch    | Western blot                  | 1:5000 |
| Goat anti-Rabbit<br>IgG(H+L)-HRP | 315-035-005 | Goat   | Jackson<br>ImmunoResearch    | Western blot                  | 1:5000 |

**Supplemental Table 6. siRNA sequences used in the experiments.**

| <b>Target</b>    | <b>Sequences (sense)</b> | <b>Sequences (anti-sense)</b> |
|------------------|--------------------------|-------------------------------|
| <b>Scrambled</b> | GUAGCCAUGAUUGACCAUATT    | UAUGGUCAAUCAUGGCUACTT         |
| <b>siE2F1</b>    | GGGACUCUGUUGGGAACAUTT    | AUGUCCCAACAGAGUCCCTT          |
| <b>HSP90-01</b>  | GGAAUUCAGAGCCCUUCUATT    | UAGAAGGGCUCUGAAUUCCTT         |
| <b>HSP90-02</b>  | GAAUUCAGAGCCCUUCAUTT     | AUAGAAGGGCUCUGAAUUCTT         |

**Supplemental Table 7. Primers for qRT-PCR experiments.**

| <b>Genes</b> | <b>Forward primer (5'-3')</b> | <b>Reverse Primer (5'-3')</b> |
|--------------|-------------------------------|-------------------------------|
| <b>GAPDH</b> | CAAGGTCATCCATGACAACCTTG       | GTCCACCACCCTGTTGCTGTAG        |
| <b>CDC6</b>  | TGGTGCTGATTGGTATTGCT          | TTTGCGGGCACAGAATTGAA          |
| <b>CDC45</b> | TAGGCCAGTCAATGTCGTCA          | GAAGGCTCTGACCCATCACT          |
| <b>MCM4</b>  | G TTCACCACTGACATACGGC         | AGACTGCTCACTTGCCACTA          |
| <b>MCM7</b>  | AGCCCATCGGATTGTGAAGA          | CCGGATTTTCATGCCTCGAG          |
| <b>MCM8</b>  | ACCTTGAGCTCCGGAAACA           | CATGCTGGGATCGCTCAAAA          |
| <b>PRIM1</b> | AAGTGCTGGACCCTCATGAC          | TTAACGTCTTGACCACCCTTT         |
| <b>RMI2</b>  | TGATGGTGATGGGAGTGTT           | AGTGTCCATGAAATCCACATCA        |



## **Supplemental Figures**

**Supplemental Figure 1. HSP90 knockdown in GRANTA-519 and MINO cells.**

**Supplemental Figure 2. Protein levels of reported lymphoma-related HSP90 clients after 12-hour ganetespib treatment.** Protein expression levels of Akt, ALK, BCL2, BCL6, JAK1, STAT3, BTK, Cdk1, Cdk2, Cdk4, Cdk6, Cyclin B, Cyclin D, Erk1/2, and c-Myc in cells with or without 12-hour ganetespib treatment. The time points chosen here are 0 and 12 hours post drug treatment.

**Supplemental Figure 3. The results of pathway enrichment using Reactome Database for the regulated genes in JEKO-1 (A), GRANTA-519 (B), and MINO (C) cells with 12-hour ganetespib treatment.**

**Supplemental Figure 4. Pathway enrichment of the 24 genes identified in Figure 4D using Reactome Pathway Database.**

**Supplemental Figure 5. The mRNA levels of CDC6, CDC45, MCM4, MCM7, MCM8, PRIM1, and RMI2 in GRANTA-519 and MINO cells with or without 12-hour ganetespib treatment.**

**Supplemental Figure 6. The graphic abstract.**

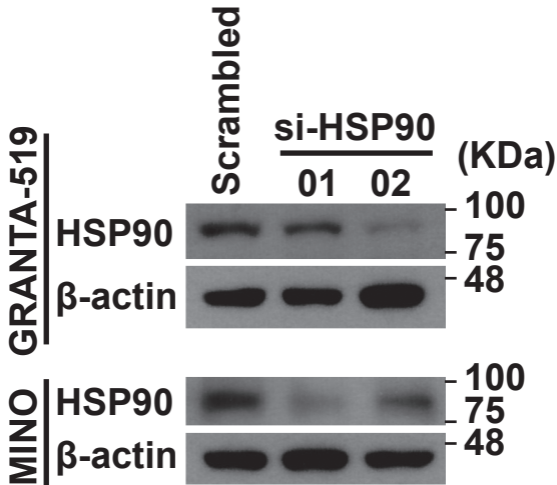

Figure S1

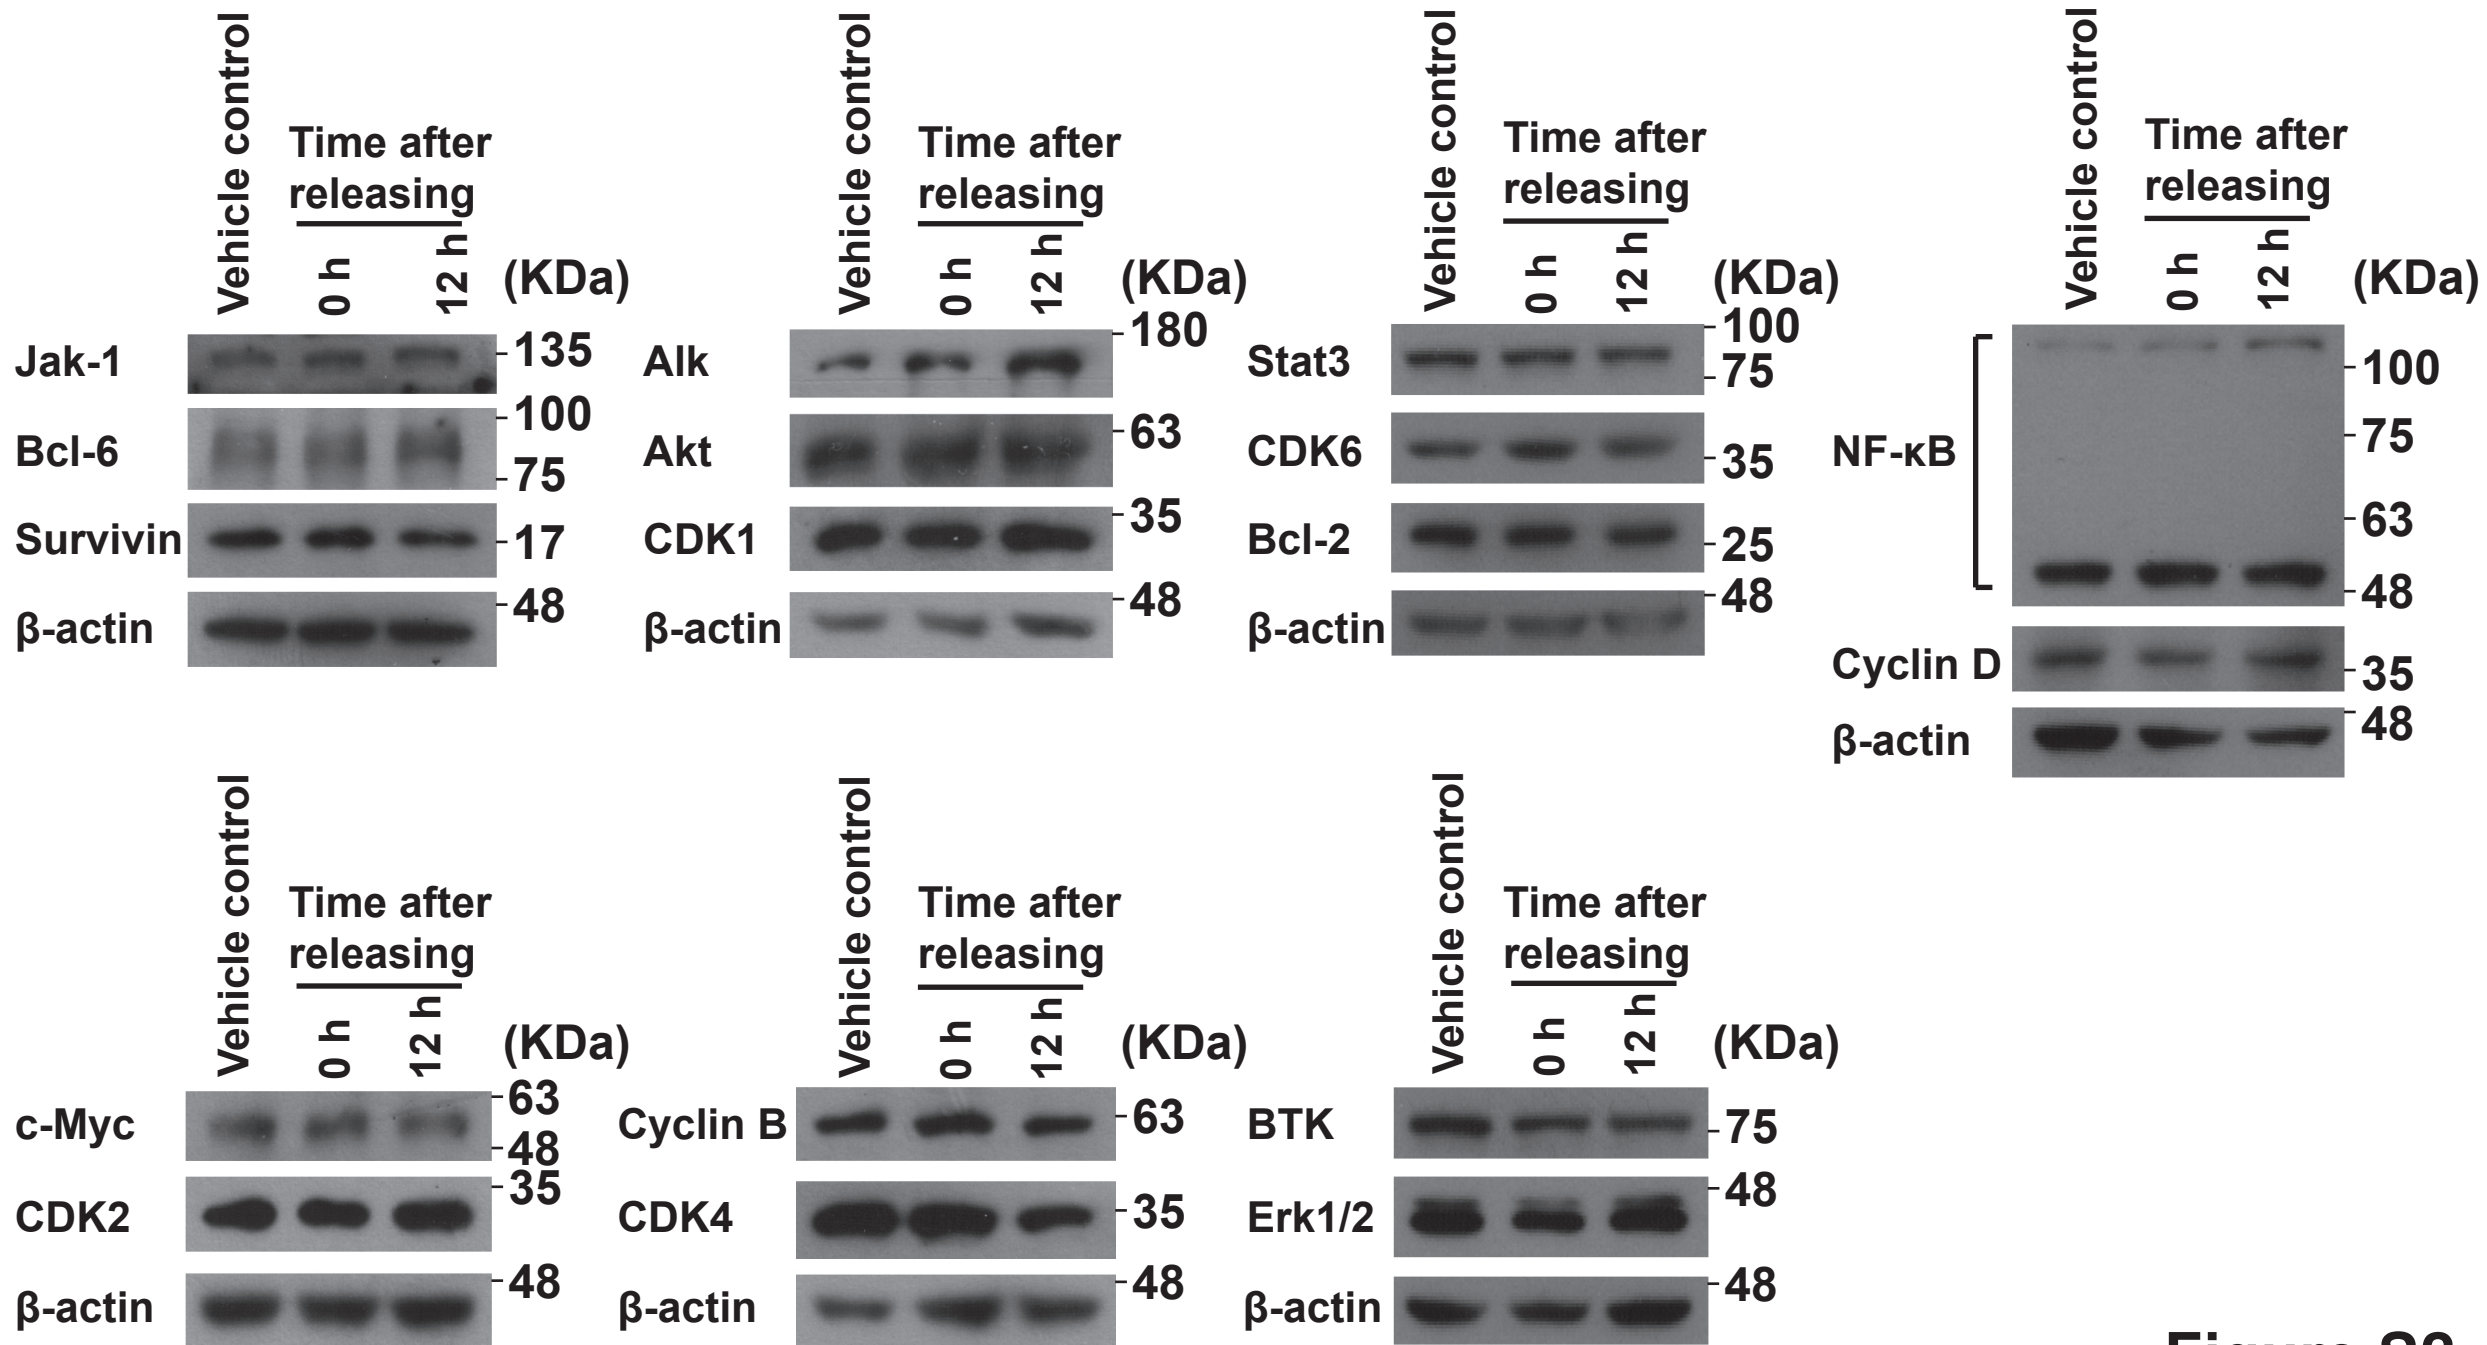

**Figure S2**

**A**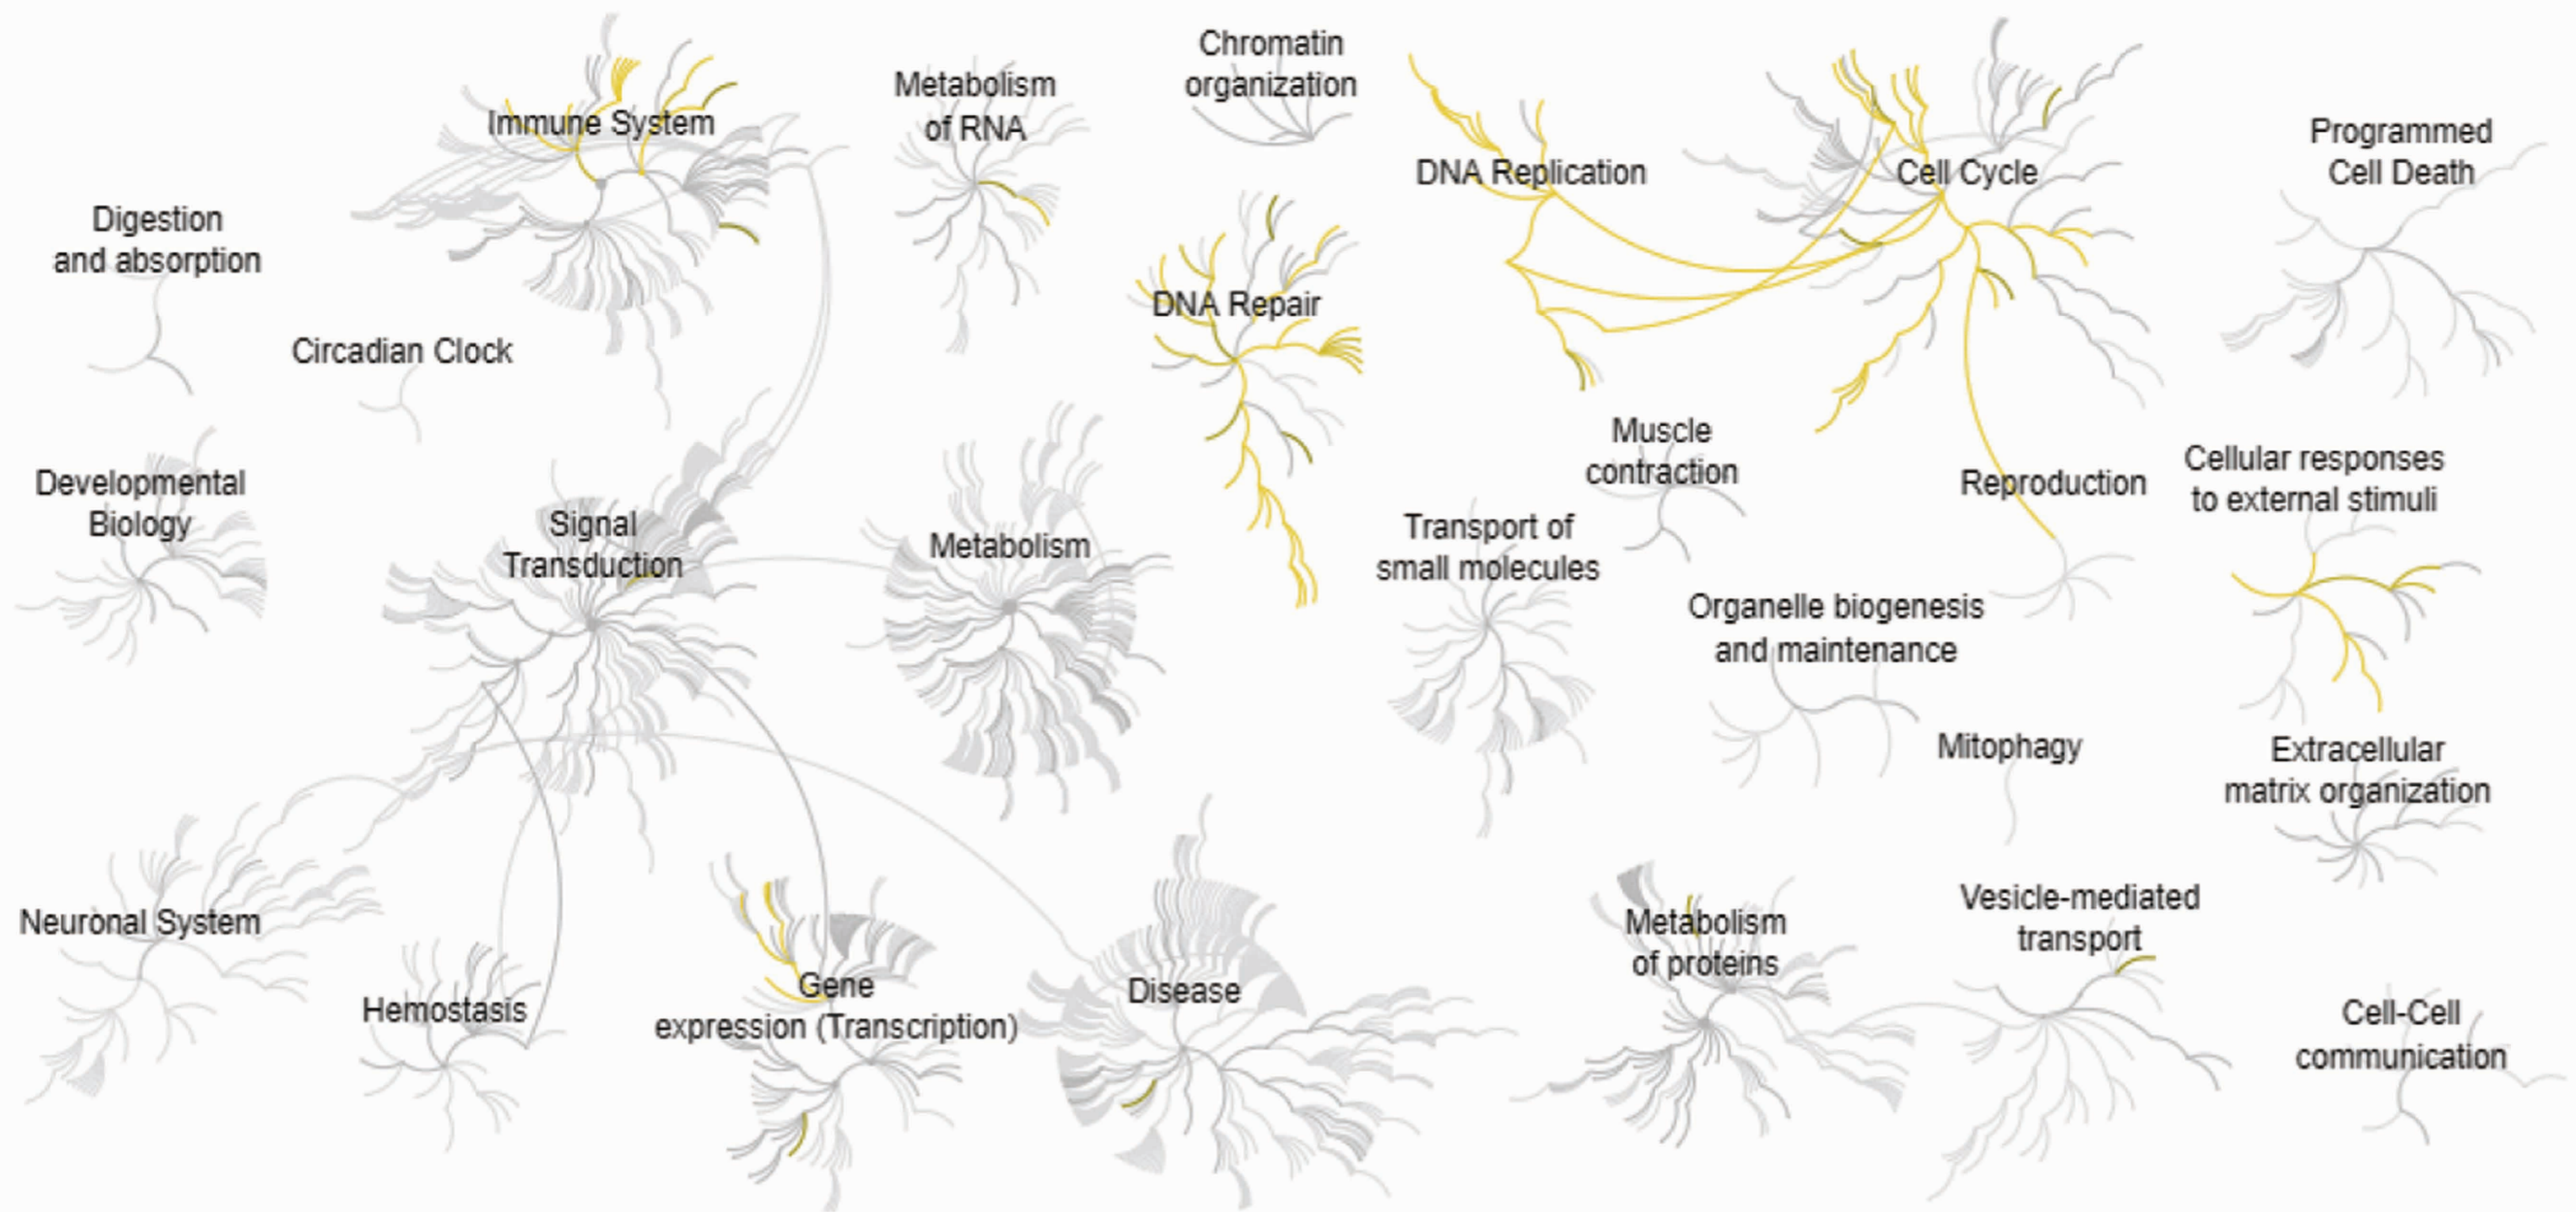**B**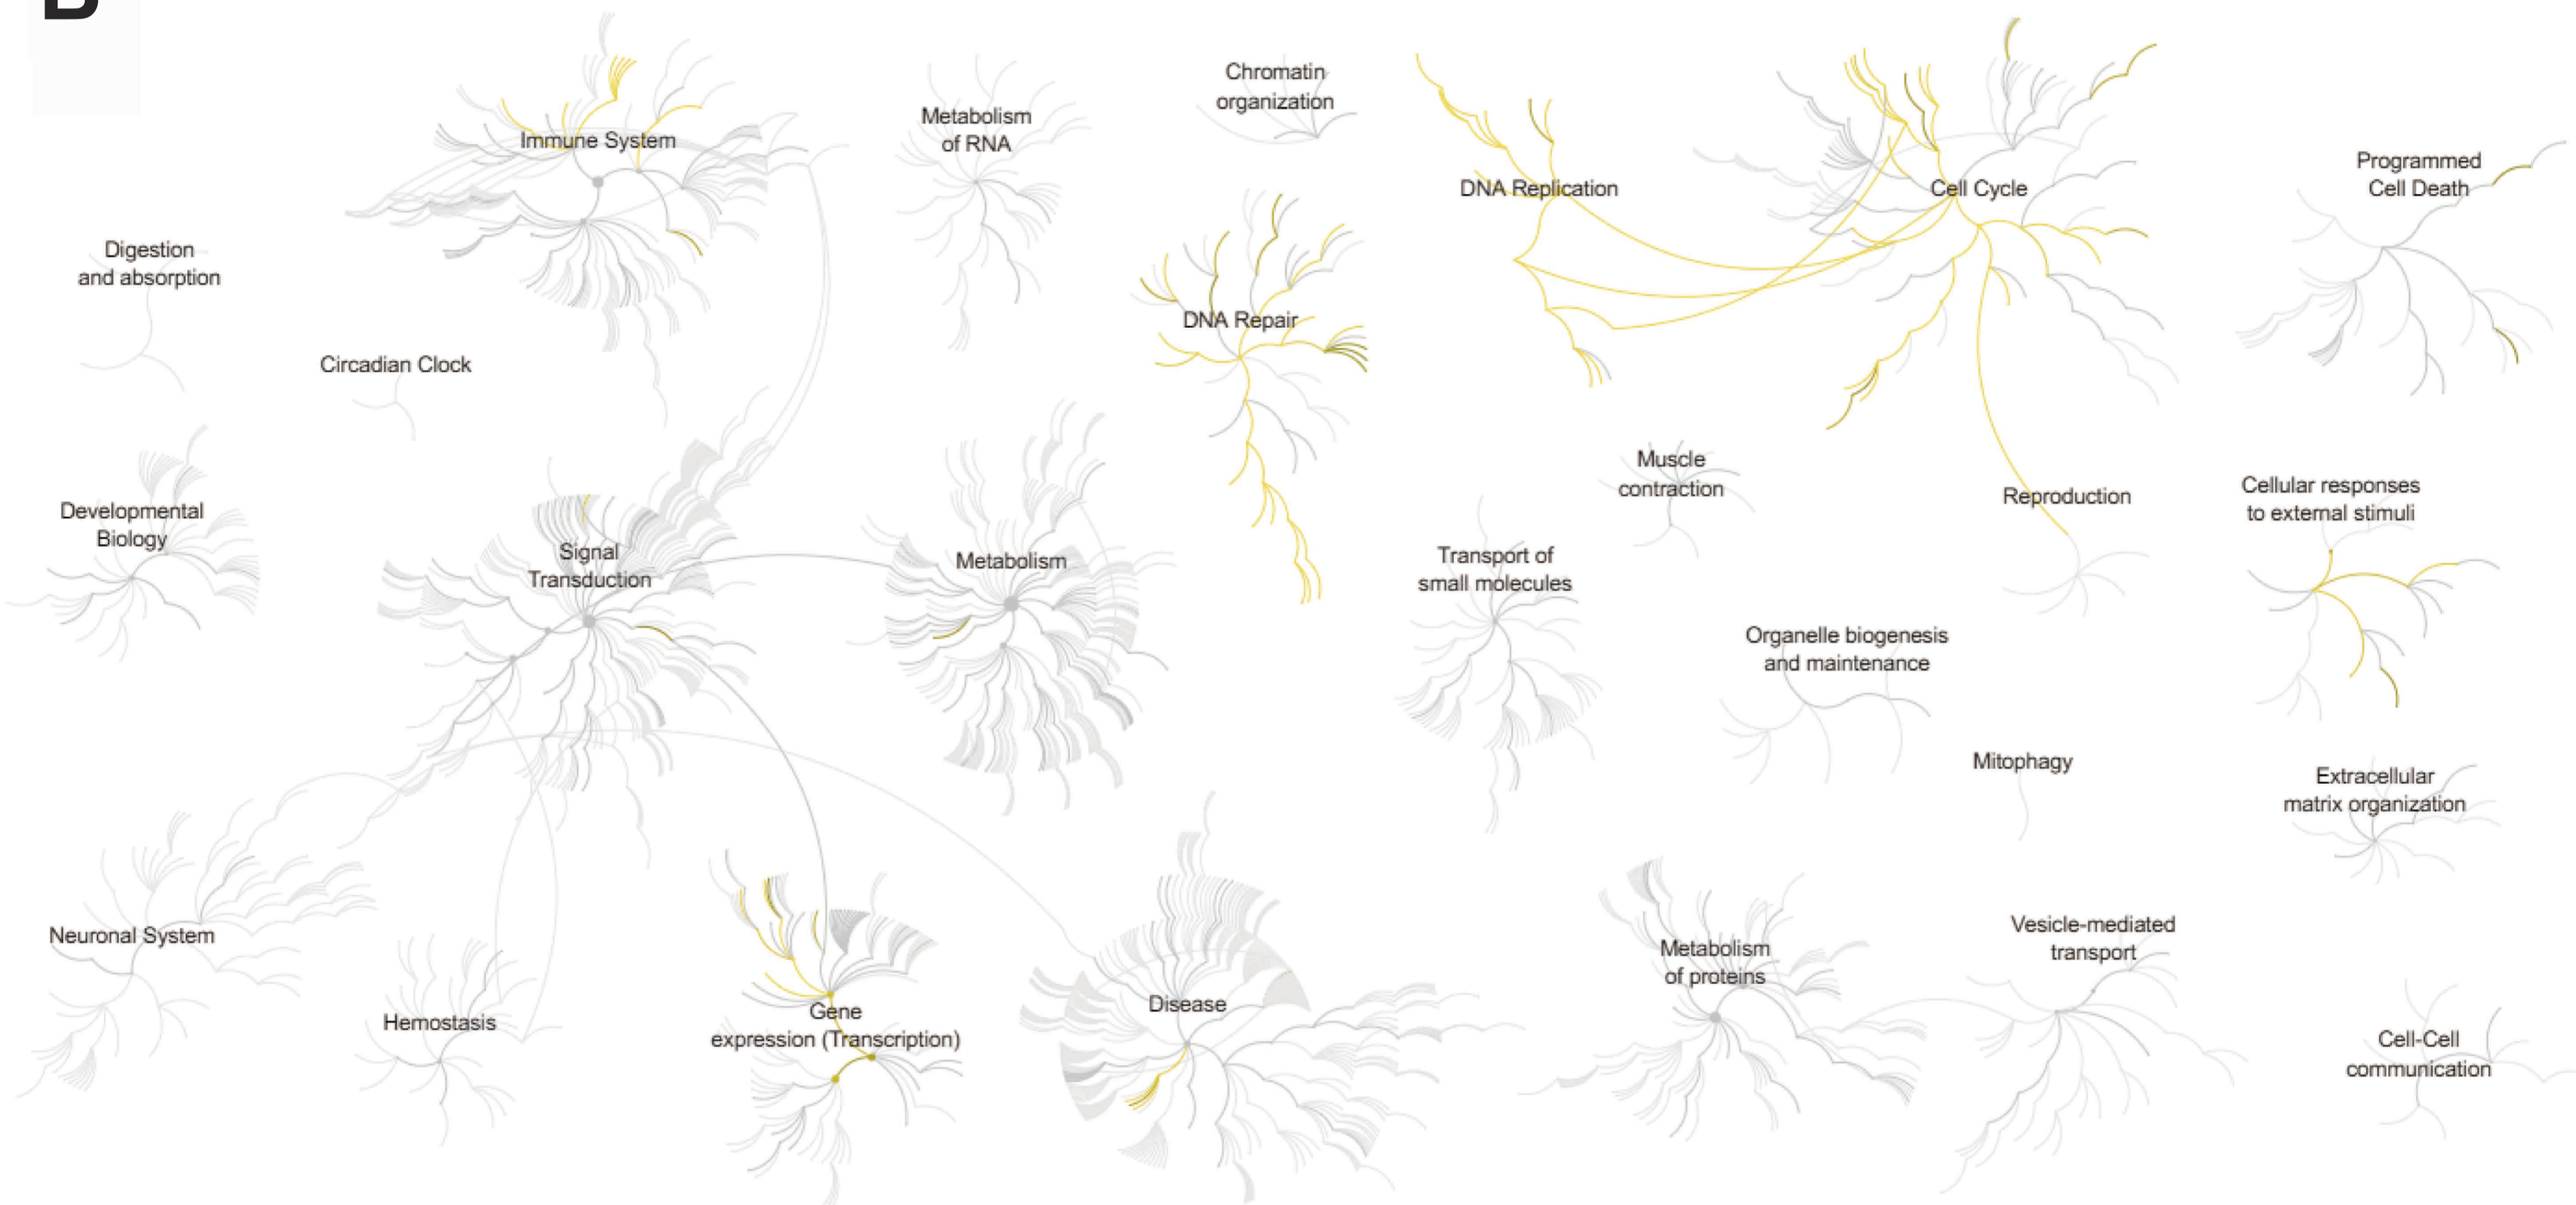**C**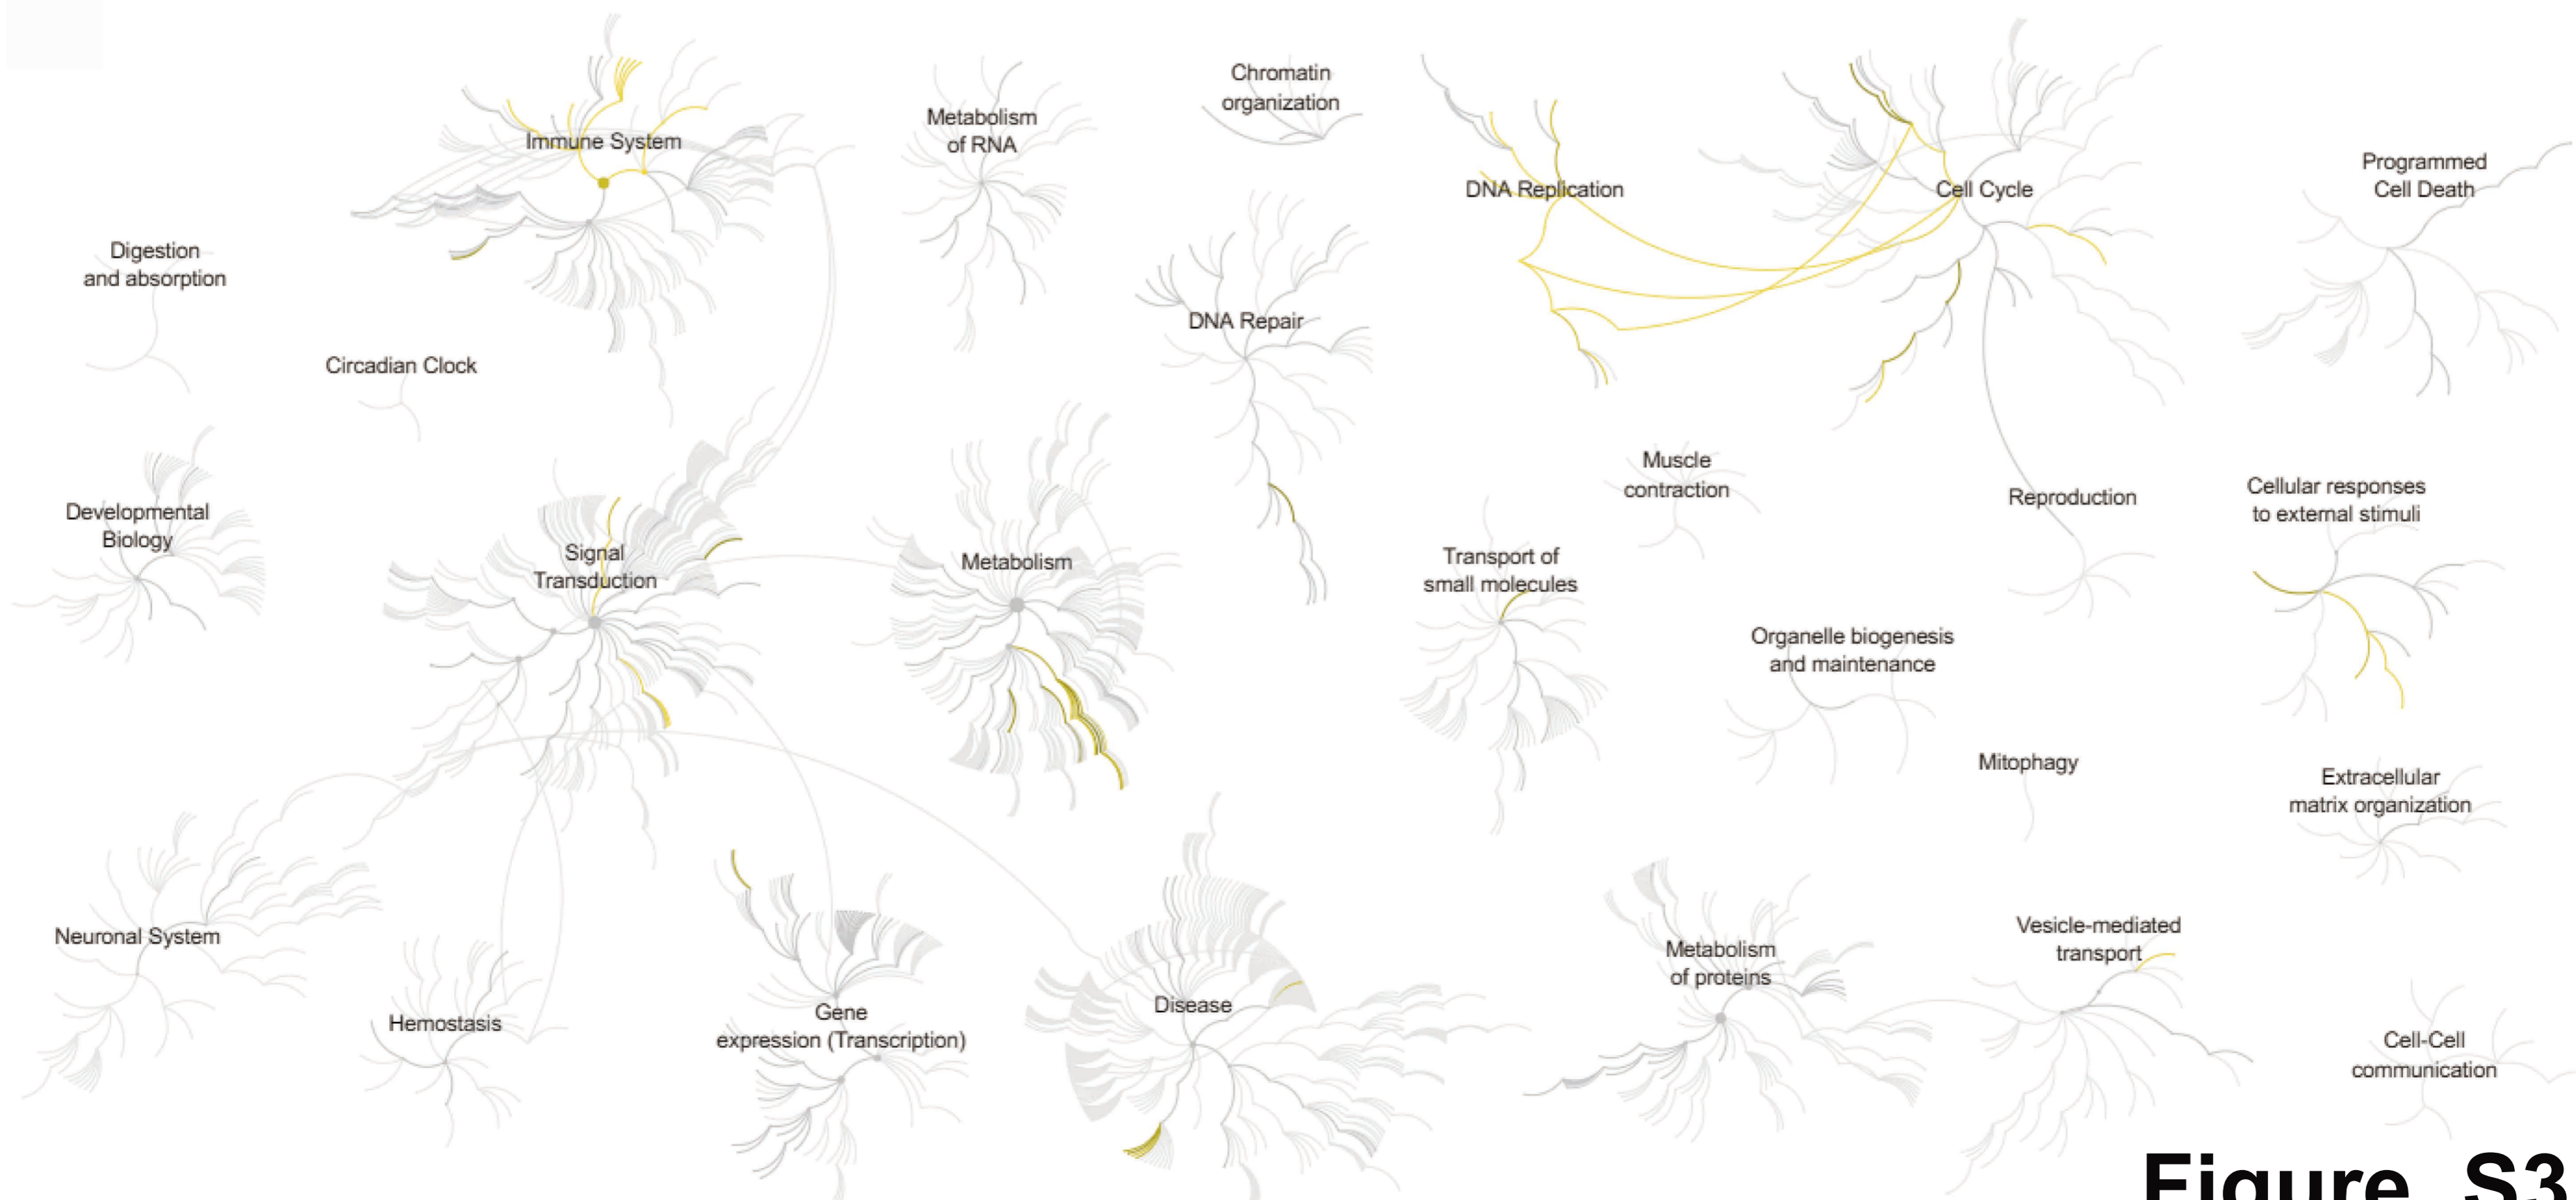**Figure S3**

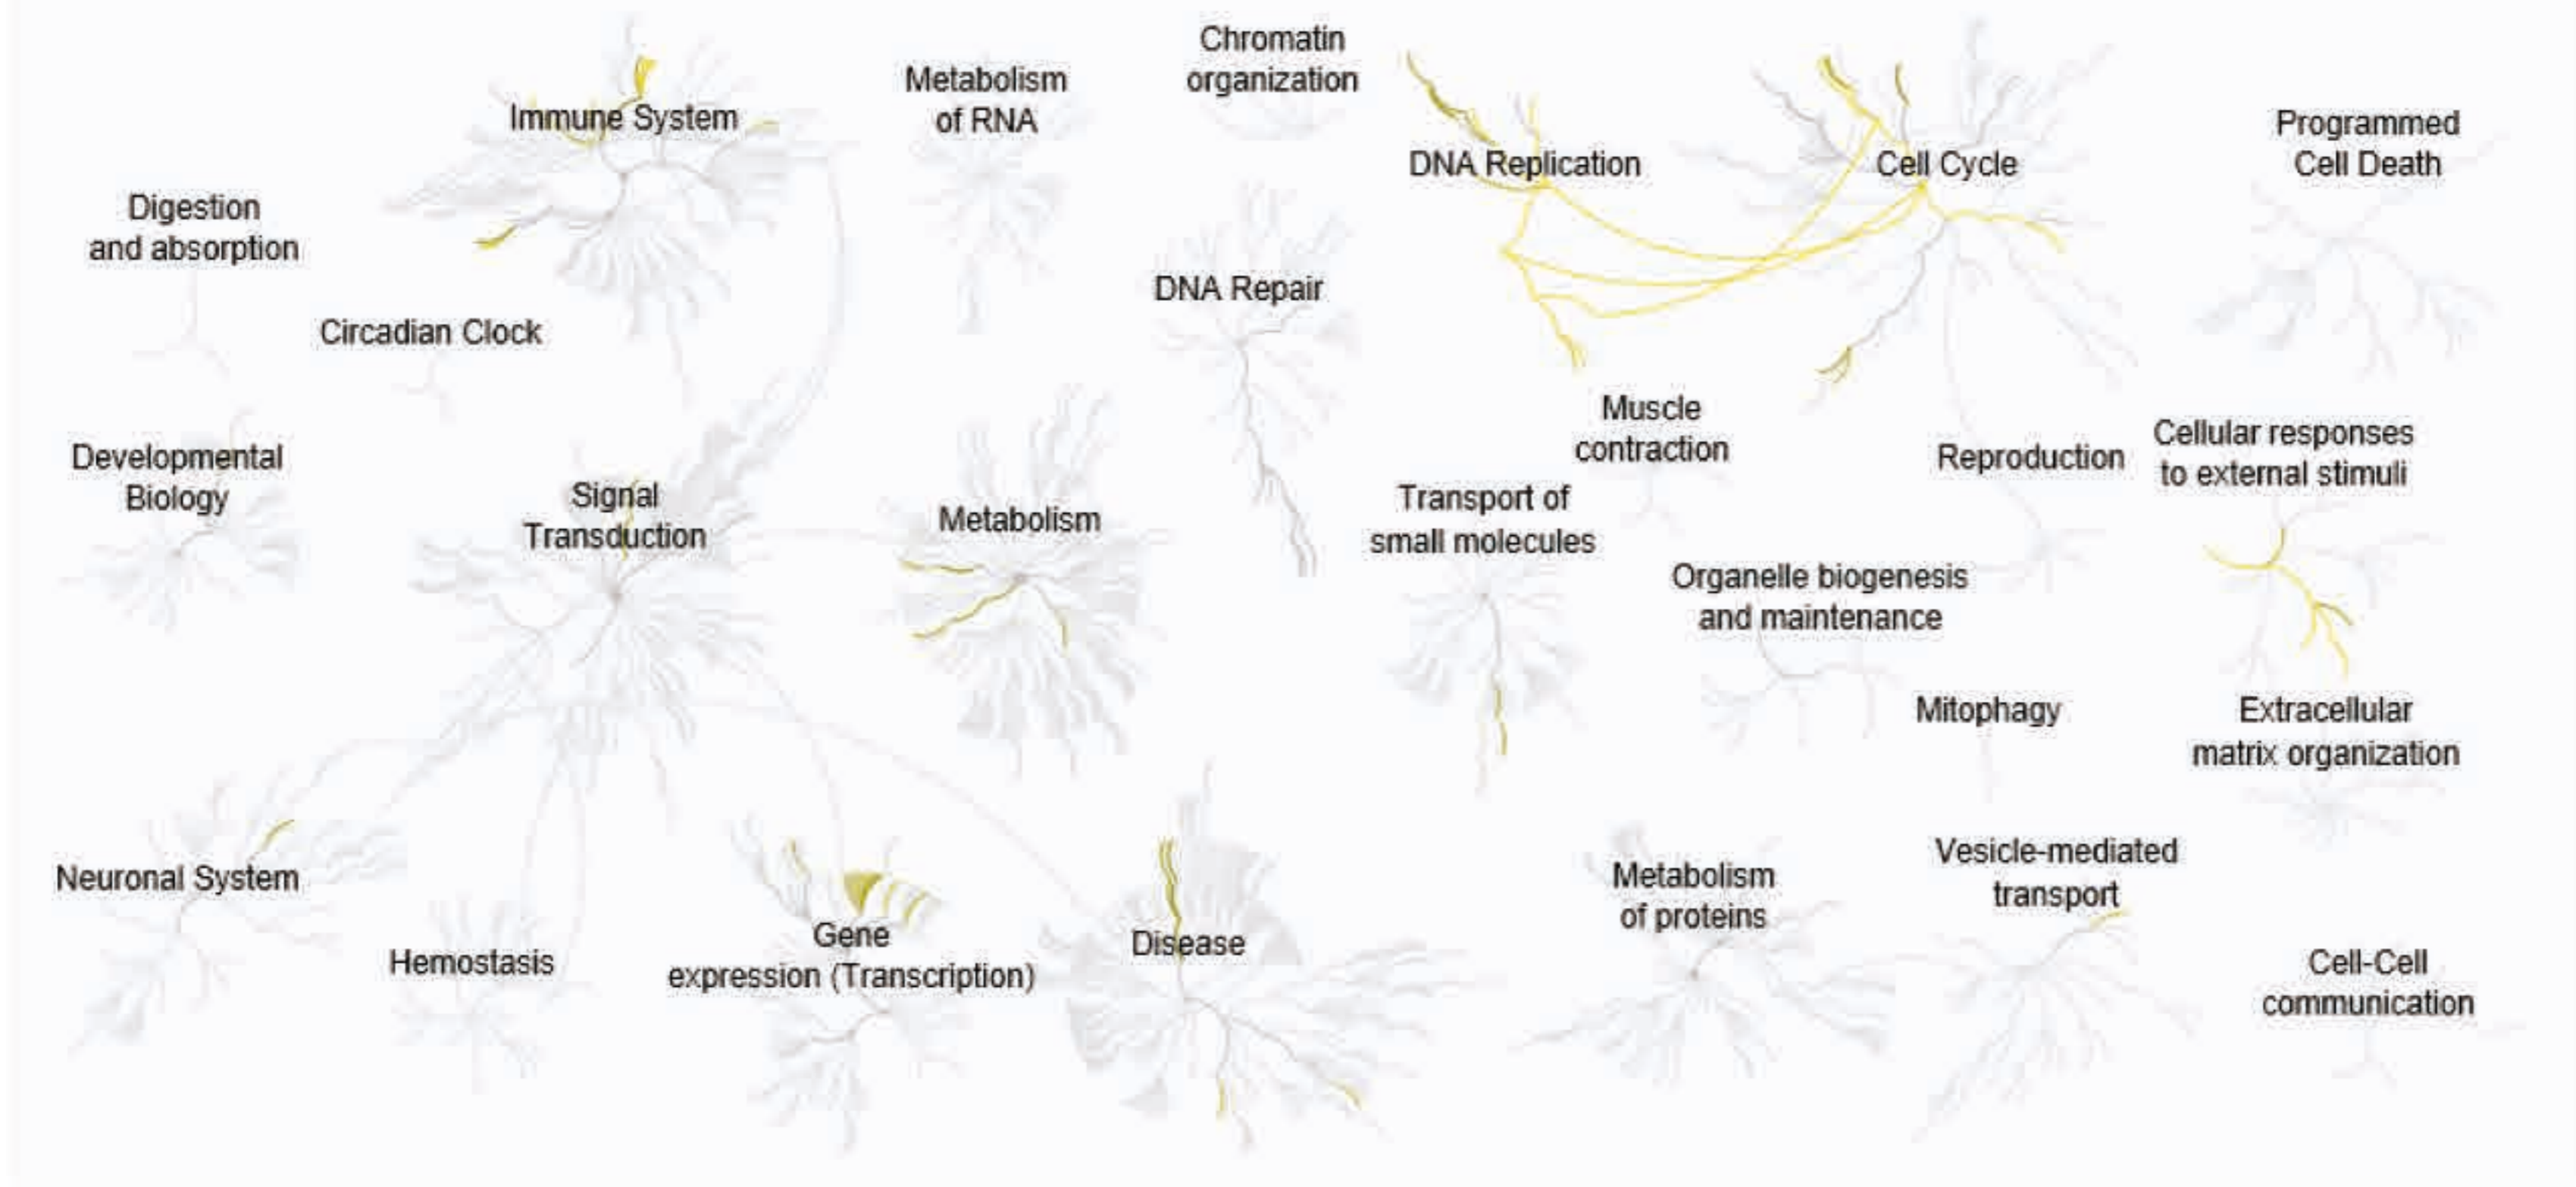

**Figure S4**

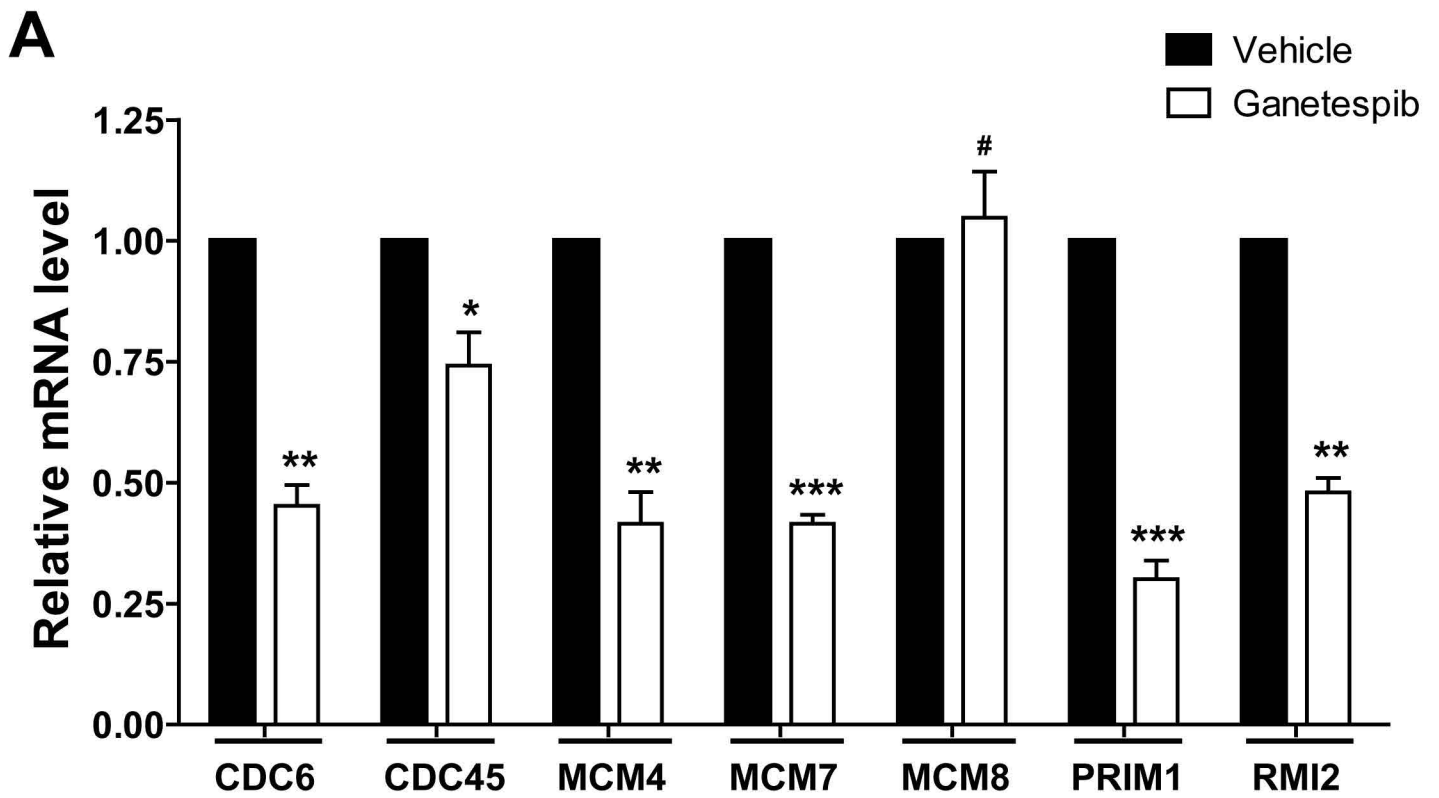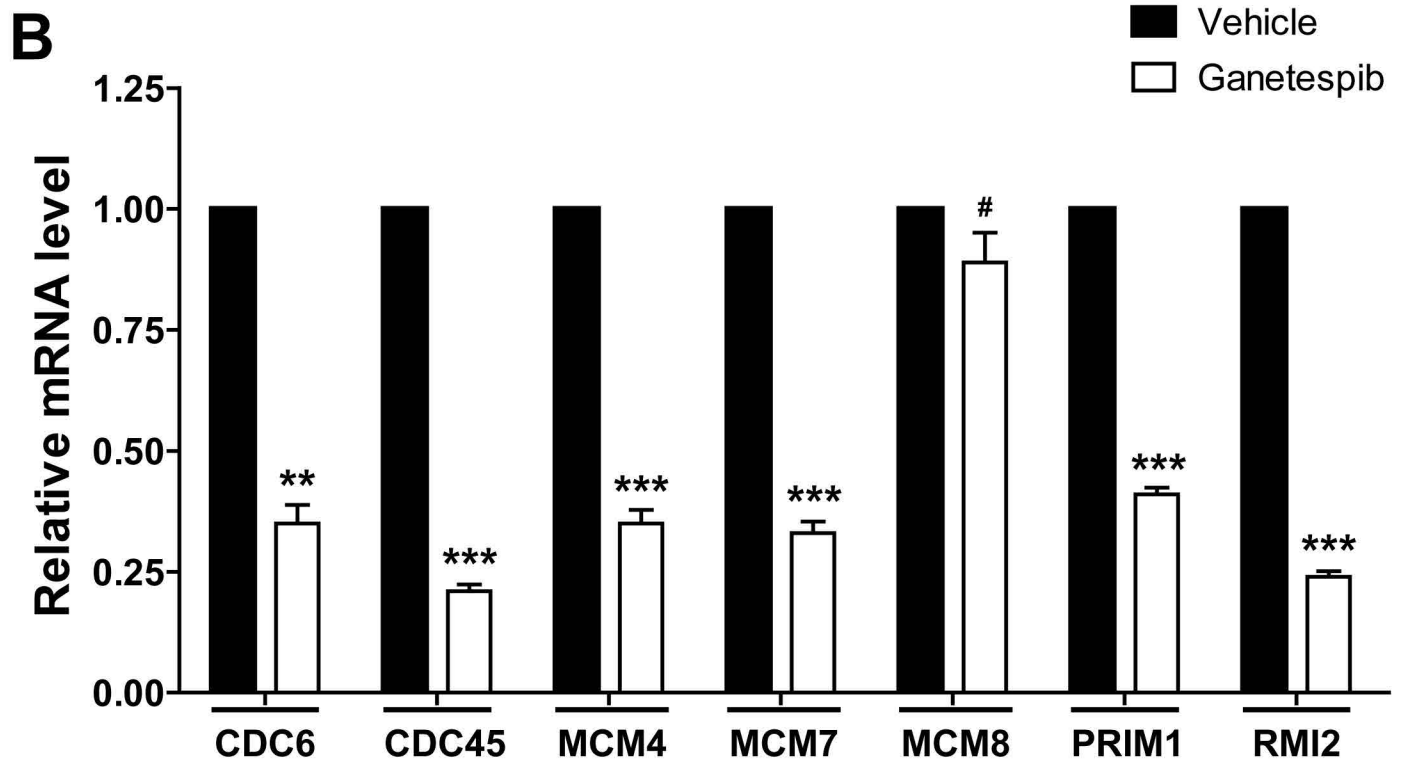

**Figure S5**

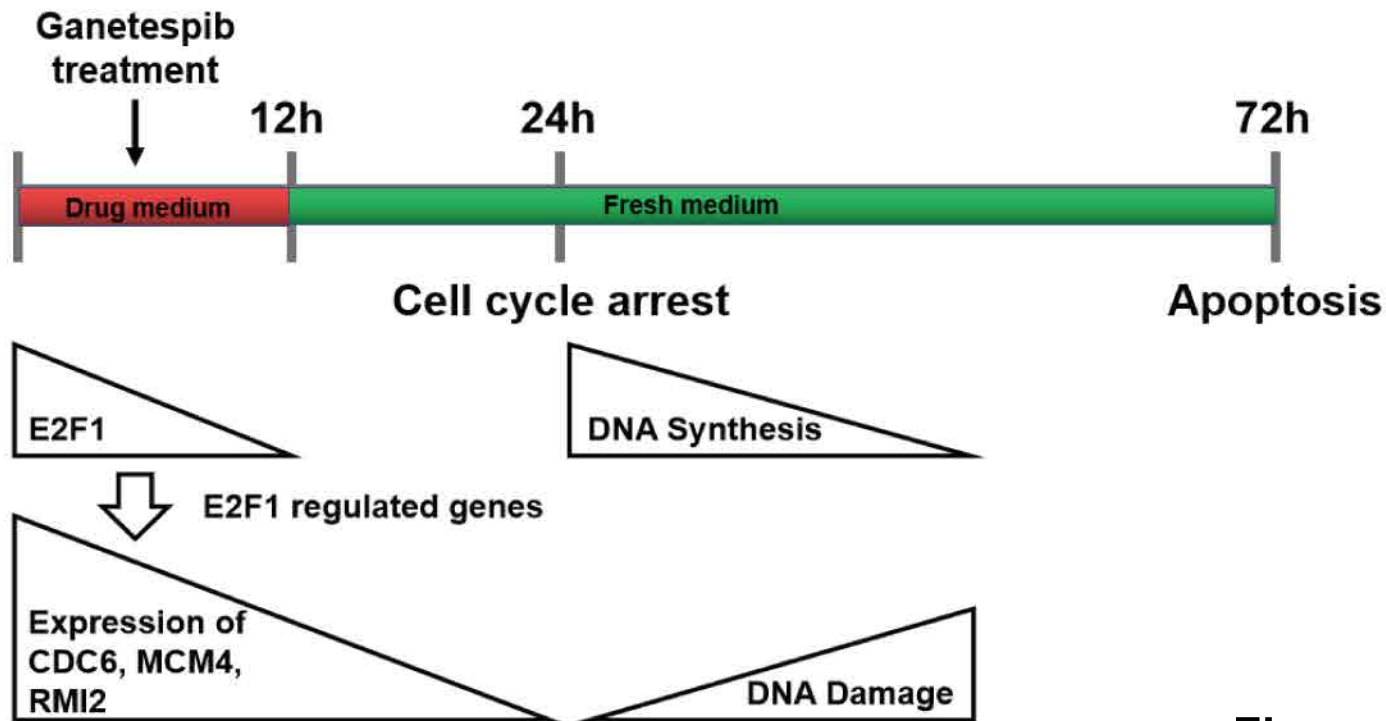

**Figure S6**
